# Supplementary material
Source: PubMed Central journal article supplement (PMC7517706)

# Applied Biosystems MDS Analytical Technologies TOF/TOF™ Series Explorer™ 72031

TOF/TOF™ Reflector Spec #1[BP = 2740.8, 1074]

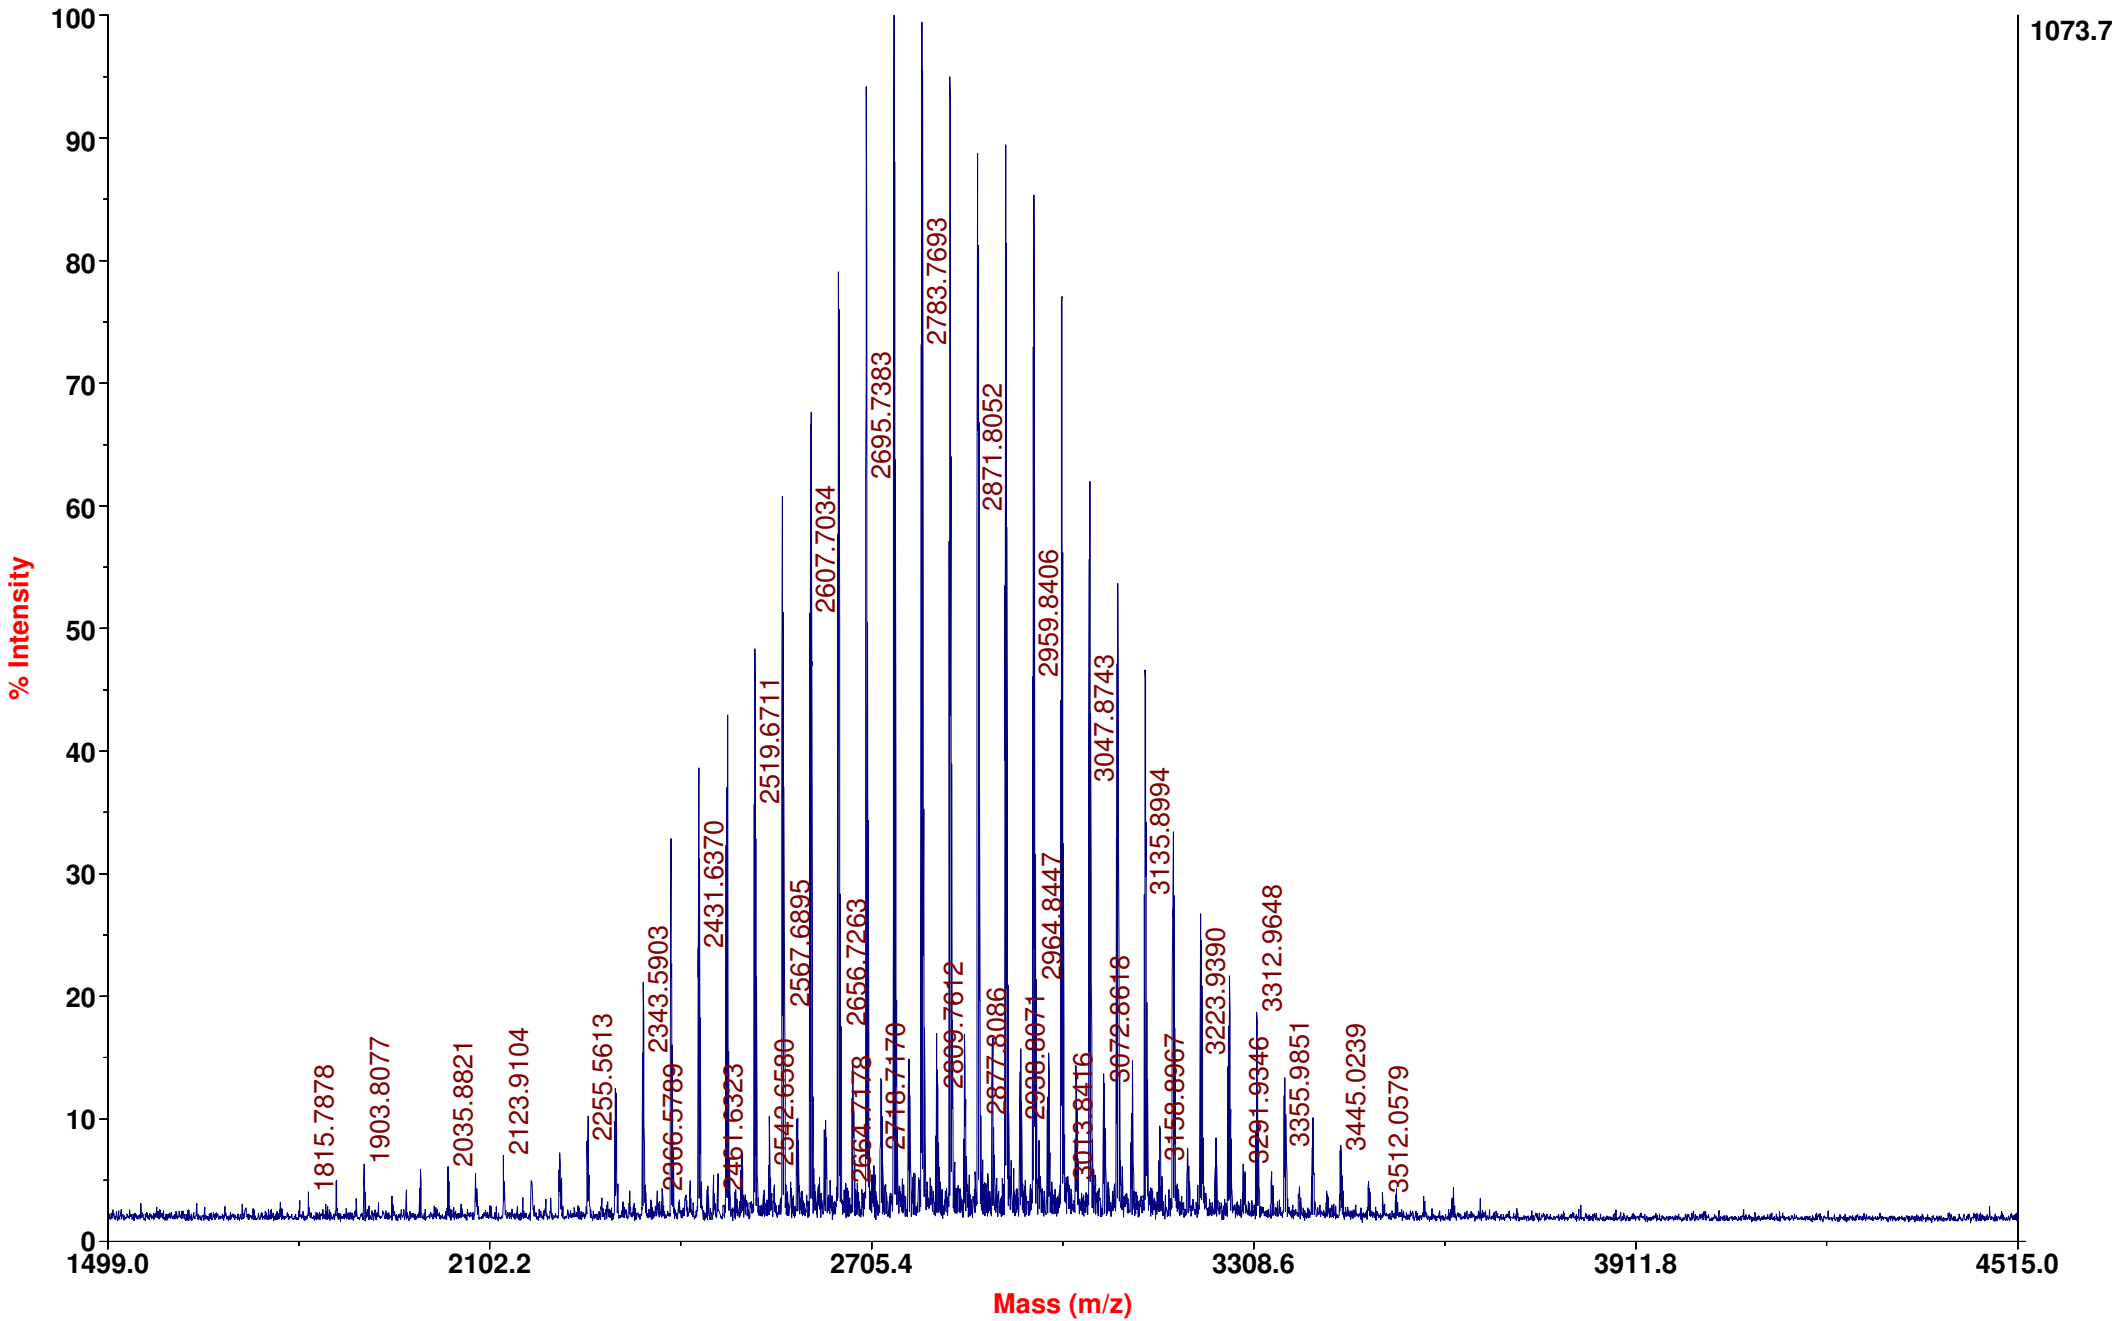

Supplement: NIHMS1028466-supplement-supp_schemeS2.pdf [file NIHMS1028466-supplement-supp_schemeS2.pdf]
